# Supplementary material
Source: HighWire-hosted journal article supplement (https://www.highwirestage.com/highwire/filestream/101968/field_highwire_adjunct_files/0/0904.pdf)
Supplement: 0904.pdf [file 0904.pdf]

**Table 1: Summary of characteristics of the newly recognized CNS tumors in the 2021 WHO classification.**

| Tumor                                                      | Patient demographics                                       | WHO grade | Imaging features                                                                                                                                                                                        | Imaging differential                                                                                                                                                                                                                                                                                                                                                                                  | Histopathology                                                                                                                                                | Molecular and genetic markers                                                                                          | Number of cases in the largest described series |
|------------------------------------------------------------|------------------------------------------------------------|-----------|---------------------------------------------------------------------------------------------------------------------------------------------------------------------------------------------------------|-------------------------------------------------------------------------------------------------------------------------------------------------------------------------------------------------------------------------------------------------------------------------------------------------------------------------------------------------------------------------------------------------------|---------------------------------------------------------------------------------------------------------------------------------------------------------------|------------------------------------------------------------------------------------------------------------------------|-------------------------------------------------|
| Diffuse astrocytoma, <i>MYB</i> - or <i>MYBL1</i> -altered | Median age 5 years (range 0-26 years), no sex predilection | 1         | Cerebral hemisphere cortex, then cerebral white matter/deep gray nuclei, then brainstem; infiltrative; T1 iso- to hypointense, heterogeneously T2 hyperintense, no diffusion restriction or enhancement | Angiocentric glioma; polymorphous low-grade neuroepithelial tumor of the young; diffuse low-grade glioma, MAPK pathway-altered; diffuse midline glioma, H3 K27-altered; diffuse hemispheric glioma, H3 G34-mutant; diffuse pediatric-type high-grade glioma, H3-wildtype and IDH-wildtype; infant-type hemispheric glioma; dysembryoplastic neuroepithelial tumor, cortical tuber, cortical dysplasia | Non-specific; astrocytes, oligodendrocytes, or both; infiltrative of CNS parenchyma, no or rare mitotic activity, no microvascular proliferation, no necrosis | Alteration (e.g., fusion, rearrangements, amplifications) of <i>MYB</i> or <i>MYBL1</i> ; IDH wildtype and H3 wildtype | 46 <sup>17</sup>                                |

|                                                           |                                                                                  |                        |                                                                                                                                            |                                                                                                                                                                                                                                                                  |                                                                                                                                                                               |                                                                                                                                                                                    |                  |
|-----------------------------------------------------------|----------------------------------------------------------------------------------|------------------------|--------------------------------------------------------------------------------------------------------------------------------------------|------------------------------------------------------------------------------------------------------------------------------------------------------------------------------------------------------------------------------------------------------------------|-------------------------------------------------------------------------------------------------------------------------------------------------------------------------------|------------------------------------------------------------------------------------------------------------------------------------------------------------------------------------|------------------|
| Polymorphous low-grade neuroepithelial tumor of the young | Median age 15.5 years (range 5-57 years), slight female predominance (M:F 1:1.7) | 1                      | Supratentorial, usually temporal lobe, cortical/subcortical, calcifications that are often dense, cystic and solid, no or mild enhancement | Oligodendroglioma, IDH-mutant and 1p/19q-codeleted; diffuse glioneuronal tumor with oligodendroglioma-like features and nuclear clusters; other pediatric low-grade tumors; dysembryoplastic neuroepithelial tumor; pleomorphic xanthoastrocytoma; ganglioglioma | Glial tumor often with oligodendroglioma-like components, frequent calcification, diffuse growth                                                                              | Genetic abnormalities activating the MAPK pathway ( <i>BRAF</i> , <i>FGFR</i> ); CD34 positive                                                                                     | 13 <sup>91</sup> |
| Diffuse low-grade glioma, MAPK pathway-altered            | Limited data; children, occasionally adults                                      | Histologically like 2* | Limited data; temporal lobe, cortical, T2 FLAIR hyperintense, no enhancement                                                               | Other pediatric-type low-grade gliomas; ganglioglioma; cortical tuber; cortical dysplasia                                                                                                                                                                        | Oligodendroglial, astrocytic, or both with an infiltrative growth pattern, minimal cellular atypia, absent/rare mitotic activity, no microvascular proliferation, no necrosis | Various; <i>FGFR1/2</i> , <i>BRAF</i> , <i>NTRK1/2/3</i> , <i>MET</i> , <i>MAP2K1</i> ; absent <i>IDH1/2</i> and <i>H3F3A</i> mutations, absent <i>CDKN2A</i> homozygous deletions | 9 <sup>92</sup>  |

|                                                                        |                                                                                                                                        |   |                                                                                                                                                                                                                                       |                                                                                                                         |                                                                                                                                                                                                   |                                                                                                                                                                  |                  |
|------------------------------------------------------------------------|----------------------------------------------------------------------------------------------------------------------------------------|---|---------------------------------------------------------------------------------------------------------------------------------------------------------------------------------------------------------------------------------------|-------------------------------------------------------------------------------------------------------------------------|---------------------------------------------------------------------------------------------------------------------------------------------------------------------------------------------------|------------------------------------------------------------------------------------------------------------------------------------------------------------------|------------------|
| Diffuse hemispheric glioma, H3 G34-mutant                              | Median age 15.8 years (interquartile range 13-22 years), slight male predominance (M:F 1.5:1)                                          | 4 | Cerebral hemisphere, usually with leptomeningeal or ependymal contact; T1 hypointense, T2 hyperintense, diffusion restriction, usually enhancement, hemorrhage, necrosis, occasionally calcifications                                 | Other pediatric-type high-grade gliomas; metastatic disease                                                             | Malignant hypercellular astrocytic gliomas with high mitotic rate, microvascular proliferation, and necrosis (“glioblastoma-type”) or “small blue cells” (“primitive neuroectodermal tumor-type”) | <i>H3F3A</i> missense mutation causing substitution of the normal glycine 34 of histone H3 by arginine or valine; also <i>ATRX</i> loss and <i>TP53</i> mutation | 81 <sup>20</sup> |
| Diffuse pediatric-type high-grade glioma, H3-wildtype and IDH-wildtype | Median age 8-11 years (range 2-18 years), no sex predilection overall but slight male predominance for <i>EGFR</i> subtype (M:F 1.6:1) | * | Usually supratentorial (temporal lobe most common) but can occur in the brainstem and cerebellum; commonly abuts the meninges; solid, enhancing, diffusion-restricting, well marginated, necrotic, rare hemorrhage, no calcifications | Other pediatric-type high-grade gliomas; AT/RT and other CNS embryonal tumors; medulloblastoma                          | Hypercellular, spindle and epithelioid cells, high mitotic rate, necrosis, and microvascular proliferation                                                                                        | Variable; most commonly amplifications of <i>MYCN</i> then <i>PDGFRA</i> then <i>EFGR</i>                                                                        | 87 <sup>24</sup> |
| Infant-type hemispheric glioma                                         | Median age 2.8 months (range 0.0-12.0 months), no sex predilection                                                                     | * | Cerebral hemisphere; large with solid with prominent cystic components, hemorrhage, regions of enhancement                                                                                                                            | Other pediatric-type high-grade gliomas; desmoplastic infantile ganglioglioma or astrocytoma; ependymoma; ganglioglioma | Hypercellular astrocytic gliomas with necrosis, microvascular proliferation, and nuclear pleomorphism                                                                                             | Gene fusions of <i>ALK</i> , <i>ROS1</i> , <i>NTRK1/2/3</i> , or <i>MET</i>                                                                                      | 65 <sup>28</sup> |

|                                                                                                         |                                                                                                                  |                      |                                                                                                                                                                                                                                                   |                                                                                                                                                                                                                          |                                                                                                                                                                                                    |                                                                                                                                                                                            |                  |
|---------------------------------------------------------------------------------------------------------|------------------------------------------------------------------------------------------------------------------|----------------------|---------------------------------------------------------------------------------------------------------------------------------------------------------------------------------------------------------------------------------------------------|--------------------------------------------------------------------------------------------------------------------------------------------------------------------------------------------------------------------------|----------------------------------------------------------------------------------------------------------------------------------------------------------------------------------------------------|--------------------------------------------------------------------------------------------------------------------------------------------------------------------------------------------|------------------|
| High-grade astrocytoma with piloid features                                                             | Pediatrics to the elderly (median age 41.5 years), no sex predilection, associated with neurofibromatosis type 1 | Behaves like 3 or 4* | Most posterior fossa, then supratentorial, then spinal; T1 iso- to hypointense, T2 hyperintense, heterogeneous enhancement, no diffusion restriction; well or poorly marginated, with or without adjacent edema/infiltration, usually no necrosis | Glioblastoma; pilocytic astrocytoma; diffuse midline glioma, H3 K27-altered                                                                                                                                              | Variable; moderate cellularity, moderate nuclear pleomorphism, elevated mitotic rate, vascular hypertrophy, and infiltrative growth pattern, lack of necrosis, can have glioblastoma-like foci     | Characteristic DNA methylation profile; commonly <i>CDKN2A/B</i> deletion, MAPK pathway alteration ( <i>NF1</i> , <i>BRAF</i> , <i>FGFR1</i> ), <i>ATRX</i> mutation or loss of expression | 83 <sup>32</sup> |
| Diffuse glioneuronal tumor with oligodendroglioma-like features and nuclear clusters (provisional type) | Median age 9 years (range 2-75 years), no sex predilection                                                       | *                    | Limited data; cerebral hemisphere (temporal lobe more common); T1 hypointense, T2 hyperintense, calcifications, minimal to no enhancement, predominantly solid with cystic components                                                             | Polymorphous low-grade neuroepithelial tumor of the young; other pediatric-type low-grade gliomas; oligodendroglioma, IDH-mutant and 1p/19q-codeleted; neurocytoma; dysembryoplastic neuroepithelial tumor; glioblastoma | Oligodendroglioma-like perinuclear haloes, clear cells, vascular proliferation, nuclear clusters (“pennies on a plate”), moderate to high cellularity, infiltrative growth pattern, calcifications | Characteristic DNA methylation profile, monosomy 14                                                                                                                                        | 31 <sup>34</sup> |

|                                             |                                                                                |   |                                                                                                                                                                                                                                    |                                                                                                                                        |                                                                                                         |                                                                                                                                                                                                                             |                  |
|---------------------------------------------|--------------------------------------------------------------------------------|---|------------------------------------------------------------------------------------------------------------------------------------------------------------------------------------------------------------------------------------|----------------------------------------------------------------------------------------------------------------------------------------|---------------------------------------------------------------------------------------------------------|-----------------------------------------------------------------------------------------------------------------------------------------------------------------------------------------------------------------------------|------------------|
| Myxoid glioneuronal tumor                   | Median age 23.6 years (range 6-65 years), no sex predilection                  | 1 | Often at the septum pellucidum; well circumscribed lobulated mass, T1 hypointense, T2 hyperintense, peripheral rim of T2 FLAIR hyperintensity with partially suppressed signal centrally, facilitated diffusion, no adjacent edema | Third ventricle colloid cyst; central neurocytoma; subependymoma                                                                       | Low-grade oligodendrocyte-like tumor cells in a mucin-rich stroma, neurocytic rosettes                  | <i>PDGFRA</i> p.K385 mutation; positive for GFAP and Olig2                                                                                                                                                                  | 8 <sup>38</sup>  |
| Multinodular and vacuolating neuronal tumor | Median age 41 years (range 8-63 years), slight female predominance (M:F 1:1.4) | 1 | Variably sized nodular lesions in the subcortical white matter following the gyral contour, most common in the frontal lobe; T1 isointense, T2 hyperintense; no enhancement, diffusion restriction, mass effect, or adjacent edema | Dysembryoplastic neuroepithelial tumor; ganglion cell tumors; low grade gliomas; focal cortical dysplasia; enlarged perivascular space | Discrete nodules with immature neuronal cells, prominent nucleoli, pericellular eccentric vacuolization | <i>MAP2K1</i> mutation (most common); <i>FGFR2-ZMYND11</i> translocation; alterations of <i>BRAF</i> , <i>DEPDC5</i> , <i>SMO</i> , <i>TP53</i> , <i>PIK3CA</i> , <i>CIC</i> ; positive for Olig2, alpha INA, synaptophysin | 33 <sup>41</sup> |

|                                                        |                                                                             |        |                                                                                                                                                                                                            |                                                                                               |                                                                                                                               |                                                                                           |                   |
|--------------------------------------------------------|-----------------------------------------------------------------------------|--------|------------------------------------------------------------------------------------------------------------------------------------------------------------------------------------------------------------|-----------------------------------------------------------------------------------------------|-------------------------------------------------------------------------------------------------------------------------------|-------------------------------------------------------------------------------------------|-------------------|
| Supratentorial ependymoma, <i>YAP1</i> fusion-positive | Median age 1.4 years (range 0-51 years), female predominance (M:F 1:3)      | 2 or 3 | Within or adjacent to the lateral ventricles; heterogenously T1 iso- to hypointense, T2 iso- to hyperintense; calcification common, enhances, restricts diffusion, can have hemorrhage                     | High-grade glioma; oligodendroglioma, IDH-mutant and 1p/19q-codeleted                         | Bipolar spindle cells with elongated processes, prominent hyalinization, scattered calcification, perivascular pseudorosettes | <i>YAP1:MAMLD1</i> fusion, <i>YAP1:FAM118B</i> fusion; positive for GFAP, S-100, vimentin | 13 <sup>45</sup>  |
| Posterior fossa ependymoma, group PFA                  | Median age 3 years (range 0-51 years), slight male predominance (M:F 1.8:1) | 2 or 3 | Arises from fourth ventricular roof or cerebellopontine angle, extends through foramen of Luschka/Magendie; T1 iso- to hypointense, T2 hyperintense; heterogenous enhancement, usually restricts diffusion | Medulloblastoma; subependymoma; choroid plexus papilloma/carcinoma; choroid plexus metastasis | Well-differentiated cells with ependymal rosettes; perivascular pseudorosettes and dystrophic calcifications can be present   | Loss of H3 K27 trimethylation due to <i>EZH2</i> overexpression                           | 240 <sup>45</sup> |
| Posterior fossa ependymoma, group PFB                  | Median age 27.5 years (range 1-72 years), no sex predilection               | 2 or 3 | Similar to group PFA except: more commonly arise from the floor of the fourth ventricle, more cystic, less calcified, less enhancing                                                                       | Medulloblastoma; subependymoma; choroid plexus papilloma/carcinoma; choroid plexus metastasis | Similar to group PFA                                                                                                          | Increased H3 K27 trimethylation; positive for GFAP, S100, vimentin                        | 212 <sup>55</sup> |

|                                                     |                                                                           |                                       |                                                                                                                                                                                                                                                                                         |                                                                                                           |                                                                                                                                                                                                             |                                                                                                                                                                         |                  |
|-----------------------------------------------------|---------------------------------------------------------------------------|---------------------------------------|-----------------------------------------------------------------------------------------------------------------------------------------------------------------------------------------------------------------------------------------------------------------------------------------|-----------------------------------------------------------------------------------------------------------|-------------------------------------------------------------------------------------------------------------------------------------------------------------------------------------------------------------|-------------------------------------------------------------------------------------------------------------------------------------------------------------------------|------------------|
| Spinal ependymoma, <i>MYCN</i> -amplified           | Median age 32 years (range 12-56 years), no sex predilection              | Histologically like 3, can be like 2* | Spinal cord; iso- to hyperdense; T1 iso- to hypointense, T2 iso- to hyperintense; enhances; usually has cystic components, hemorrhage, necrosis, calcification                                                                                                                          | Spinal astrocytoma; spinal cavernous malformation                                                         | Anaplastic features; hypercellular, marked cellular atypia, nuclear hyperchromasia, prominent nucleoli, necrosis, glomeruloid vascular proliferation                                                        | <i>MYCN</i> amplification; positive for GFAP and EMA                                                                                                                    | 13 <sup>58</sup> |
| Cribriform neuroepithelial tumor (provisional type) | Median age 1.7 years (range 0.8-10.8 years), no definite sex predilection | *                                     | Within or adjacent to the lateral, third, or fourth ventricles; T1 hypointense, T2 hyperintense, enhances, restricts diffusion                                                                                                                                                          | Choroid plexus papilloma/carcinoma                                                                        | Cribriform strands and ribbons, nuclei with dense chromatin and ill-defined cytoplasm                                                                                                                       | <i>SMARCB1</i> deletion; positive for tyrosinase, EMA, vimentin, MAP2C, synaptophysin                                                                                   | 10 <sup>65</sup> |
| CNS neuroblastoma, <i>FOXR2</i> -activated          | Median age 4.5 years (range 1.4-16 years), no sex predilection            | *                                     | Supratentorial, deep white matter; cortical and ependymal involvement common; often multiple regions with frontal the most common; multilobulated solid/cystic; internal hemorrhage/calcification (40%); little/no peritumoral edema; remodeling/signal changes of overlying bone (50%) | CNS tumor with <i>BCOR</i> internal tandem duplication; AT/RT; embryonal tumor with multilayered rosettes | Small cell tumor with embryonal architecture, high mitotic count; neuropil, neurocytic cell, or ganglion cell differentiation; vascular pseudorosettes, nuclear palisades; positive Olig2 and synaptophysin | Inter-/intra-chromosomal rearrangements converging on <i>FOXR2</i> causing expression; mitochondrial DNA insertion within <i>USP51</i> as a novel <i>FOXR2</i> promoter | 25 <sup>69</sup> |

|                                                        |                                                                             |   |                                                                                                                                                                                                                                                                                                           |                                                                                               |                                                                                                                                                                                                                                                                          |                                                                                             |                  |
|--------------------------------------------------------|-----------------------------------------------------------------------------|---|-----------------------------------------------------------------------------------------------------------------------------------------------------------------------------------------------------------------------------------------------------------------------------------------------------------|-----------------------------------------------------------------------------------------------|--------------------------------------------------------------------------------------------------------------------------------------------------------------------------------------------------------------------------------------------------------------------------|---------------------------------------------------------------------------------------------|------------------|
| CNS tumor with <i>BCOR</i> internal tandem duplication | Median age 1.8 years (range 1.2-7.6 years), female predominance (M:F 1:2.3) | * | Supra- or infratentorial, typically peripheral with dural abutment; large, solid, central necrosis, with or without blood products/calcification; T2 hyperintense, diffusion restriction, variable mild heterogeneous enhancement, little to no peritumoral edema, large intratumoral macroscopic vessels | CNS neuroblastoma, <i>FOXR2</i> -activated; AT/RT; embryonal tumor with multilayered rosettes | Perivascular pseudorosettes, fibrillary processes (glial differentiation feature); peripheral palisading necrosis; rich branching capillary network; positive for Olig2, NeuN; diffuse strong nuclear staining for BCOR protein; negative for GFAP, synaptophysin, S-100 | In-frame internal tandem duplications in exon 15 of <i>BCL6 corepressor</i> ( <i>BCOR</i> ) | 10 <sup>70</sup> |
|--------------------------------------------------------|-----------------------------------------------------------------------------|---|-----------------------------------------------------------------------------------------------------------------------------------------------------------------------------------------------------------------------------------------------------------------------------------------------------------|-----------------------------------------------------------------------------------------------|--------------------------------------------------------------------------------------------------------------------------------------------------------------------------------------------------------------------------------------------------------------------------|---------------------------------------------------------------------------------------------|------------------|



|                                                                        |                                                                       |   |                                                                                               |                                                                |                                                                                                                                                                                                                                                           |                                                                                                                                          |                 |
|------------------------------------------------------------------------|-----------------------------------------------------------------------|---|-----------------------------------------------------------------------------------------------|----------------------------------------------------------------|-----------------------------------------------------------------------------------------------------------------------------------------------------------------------------------------------------------------------------------------------------------|------------------------------------------------------------------------------------------------------------------------------------------|-----------------|
| Desmoplastic myxoid tumor of the pineal region, <i>SMARCB1</i> -mutant | Median age 40 years (range 15-61 years), no definite sex predilection | * | Limited data; variable T1 signal, T2 isointense, enhances, can compress the cerebral aqueduct | AT/RT; pineal parenchymal tumors; germ cell tumors; metastasis | Variable myxoid morphology combined with spindled and epithelioid cells embedded in a densely collagenized stroma; occasional intranuclear inclusions; no brisk mitotic activity or tumor necrosis as seen in AT/RT; positive for CD34, negative for INI1 | Mutation in <i>SMARCB1/INI1</i> causing loss of <i>SMARCB1</i> function; characteristic DNA methylation profile in the vicinity of AT/RT | 7 <sup>72</sup> |
|------------------------------------------------------------------------|-----------------------------------------------------------------------|---|-----------------------------------------------------------------------------------------------|----------------------------------------------------------------|-----------------------------------------------------------------------------------------------------------------------------------------------------------------------------------------------------------------------------------------------------------|------------------------------------------------------------------------------------------------------------------------------------------|-----------------|

|                                                                             |                                                                         |   |                                                                                                                                                                                                                                                                                         |                                                                            |                                                                                                                                                                                                                                                                                    |                                                                                                                                                                                                                           |                  |
|-----------------------------------------------------------------------------|-------------------------------------------------------------------------|---|-----------------------------------------------------------------------------------------------------------------------------------------------------------------------------------------------------------------------------------------------------------------------------------------|----------------------------------------------------------------------------|------------------------------------------------------------------------------------------------------------------------------------------------------------------------------------------------------------------------------------------------------------------------------------|---------------------------------------------------------------------------------------------------------------------------------------------------------------------------------------------------------------------------|------------------|
| Intracranial mesenchymal tumor, FET-CREB fusion positive (provisional type) | Median age 17 years (range 4-70 years), female predominance (M:F 1:2.2) | * | Extra-axial over the cerebral convexities most common; can be intraventricular; circumscribed, lobulated, solid and cystic, enhances, intratumoral blood products, extensive peritumoral edema, variable T2 signal; dural tail and involvement of the overlying bone sometimes observed | Meningioma; solitary fibrous tumor; lymphoma                               | Variable; pseudo-encapsulation, nodular epithelioid cellular proliferations, prominent subcapsular lymphoplasmacytic aggregates with hemosiderin deposition; positive for desmin, CD99 and EMA; negative for myogenin, MyoD1, actin, caldesmon, calponin, S100, HMB45, GFAP, Olig2 | In-frame fusions of FET family RNA-binding proteins ( <i>EWSR1</i> or <i>FUS</i> ) to the CREB family transcription factors ( <i>ATF1</i> , <i>CREB1</i> , <i>CREM</i> )                                                  | 20 <sup>93</sup> |
| <i>CIC</i> -rearranged sarcoma                                              | Limited data; children and adults                                       | 4 | Limited data; anywhere along the neuroaxis; solid, multilobulated, T2 iso- to hyperintense, heterogenous enhancement, peritumoral edema                                                                                                                                                 | Ewing's sarcoma family, rhabdomyosarcoma, glioblastoma, metastatic disease | Round cell sarcoma with myxoid features and high mitotic count; histologically resembles Ewing's sarcoma; positive for CD99; extensive ETV4 and WT1 nuclear expression                                                                                                             | Rearrangements of <i>capicua transcriptional repressor (CIC)</i> ; multiple <i>CIC</i> fusion partners: <i>DUX4</i> (most common), <i>FOXO4</i> , <i>LEUTX</i> , <i>NUTM1</i> , <i>NUTM2A</i> ; lacks <i>ESWR1</i> fusion | 7 <sup>94</sup>  |

|                                                     |                                                                                                                                                |   |                                                                                                                                                                                                                                                                               |                                                                                |                                                                                                                                                                                                                                                                                                                                                                   |                                                                             |                  |
|-----------------------------------------------------|------------------------------------------------------------------------------------------------------------------------------------------------|---|-------------------------------------------------------------------------------------------------------------------------------------------------------------------------------------------------------------------------------------------------------------------------------|--------------------------------------------------------------------------------|-------------------------------------------------------------------------------------------------------------------------------------------------------------------------------------------------------------------------------------------------------------------------------------------------------------------------------------------------------------------|-----------------------------------------------------------------------------|------------------|
| Primary intracranial sarcoma, <i>DICER1</i> -mutant | Median age 6.0 years (range 2.0-17.5 years), no sex predilection, associated with familial <i>DICER1</i> syndrome and neurofibromatosis type 1 | * | Limited data; intra-axial (usually peripheral in a cerebral hemisphere) or extra-axial; T2 iso- to hypointense, diffusion restriction, avid enhancement; intratumoral hemorrhage and peritumoral edema typically present; sometimes enhancement of the meninges/leptomeninges | Glioblastoma, metastatic disease, lymphoma, solitary fibrous tumor, meningioma | Variable; contains some areas of fascicular spindle cells; focal regions of differentiation resembling embryonic-type tissues, such as rhabdomyoblastic differentiation; cellular coalescence into “organoid” formations; brightly eosinophilic cytoplasmic globules positive for PAS and alpha-1-antitrypsin; patchy desmin staining; complete loss of H3K27me12 | Germline inactivation of the <i>DICER1</i> through truncations or deletions | 28 <sup>84</sup> |
|-----------------------------------------------------|------------------------------------------------------------------------------------------------------------------------------------------------|---|-------------------------------------------------------------------------------------------------------------------------------------------------------------------------------------------------------------------------------------------------------------------------------|--------------------------------------------------------------------------------|-------------------------------------------------------------------------------------------------------------------------------------------------------------------------------------------------------------------------------------------------------------------------------------------------------------------------------------------------------------------|-----------------------------------------------------------------------------|------------------|

|                    |                                                                                                                      |   |                                                                                                            |                   |                                                                                                                                                                                                                                          |                                                |                  |
|--------------------|----------------------------------------------------------------------------------------------------------------------|---|------------------------------------------------------------------------------------------------------------|-------------------|------------------------------------------------------------------------------------------------------------------------------------------------------------------------------------------------------------------------------------------|------------------------------------------------|------------------|
| Pituitary blastoma | Median age 11 months (range 2-24 months) plus a case report of a 19-year-old, slight female predilection (M:F 1:1.4) | 4 | Variable; ranges from small solid mass to large heterogenous solid/cystic tumor, can contain calcification | Pituitary adenoma | Hypophyseal tumors resembling embryonic stage pituitary gland; primitive blastemal cells, large secretory epithelial cells expressing neuroendocrine markers such as ACTH (rarely GH); primitive Rathke-type epithelial glandular tissue | Germline or somatic mutations in <i>DICER1</i> | 17 <sup>90</sup> |
|--------------------|----------------------------------------------------------------------------------------------------------------------|---|------------------------------------------------------------------------------------------------------------|-------------------|------------------------------------------------------------------------------------------------------------------------------------------------------------------------------------------------------------------------------------------|------------------------------------------------|------------------|

\* = not yet assigned an official WHO grade, IDH = isocitrate dehydrogenase, AT/RT = atypical teratoid/rhabdoid tumor

## References

See main article for references 1. to 90.

91. Ida CM, Johnson DR, Nair AA, et al. Polymorphous Low-Grade Neuroepithelial Tumor of the Young (PLNTY): Molecular Profiling Confirms Frequent MAPK Pathway Activation. *J Neuropathol Exp Neurol*. Sep 27 2021;80(9):821-829. doi:10.1093/jnen/nlab075
92. Metais A, Appay R, Pages M, et al. Low-grade epilepsy-associated neuroepithelial tumours with a prominent oligodendroglioma-like component: The diagnostic challenges. *Neuropathol Appl Neurobiol*. Feb 2022;48(2):e12769. doi:10.1111/nan.12769
93. Sloan EA, Gupta R, Koelsche C, et al. Intracranial mesenchymal tumors with FET-CREB fusion are composed of at least two epigenetic subgroups distinct from meningioma and extracranial sarcomas. *Brain Pathol*. Jul 2022;32(4):e13037. doi:10.1111/bpa.13037
94. Liu APY, Dhanda SK, Lin T, et al. Molecular classification and outcome of children with rare CNS embryonal tumors: results from St. Jude Children's Research Hospital including the multi-center SJYC07 and SJMB03 clinical trials. *Acta Neuropathol*. Oct 2022;144(4):733-746. doi:10.1007/s00401-022-02484-7
